# Supplementary material for: Temporal dynamics of microbiota before and after host death
Source: PubMed Central journal article supplement (PMC6052066; doi:10.1038/s41396-018-0157-2), 2018-06-04

# Appendix S1: Sampling scheme

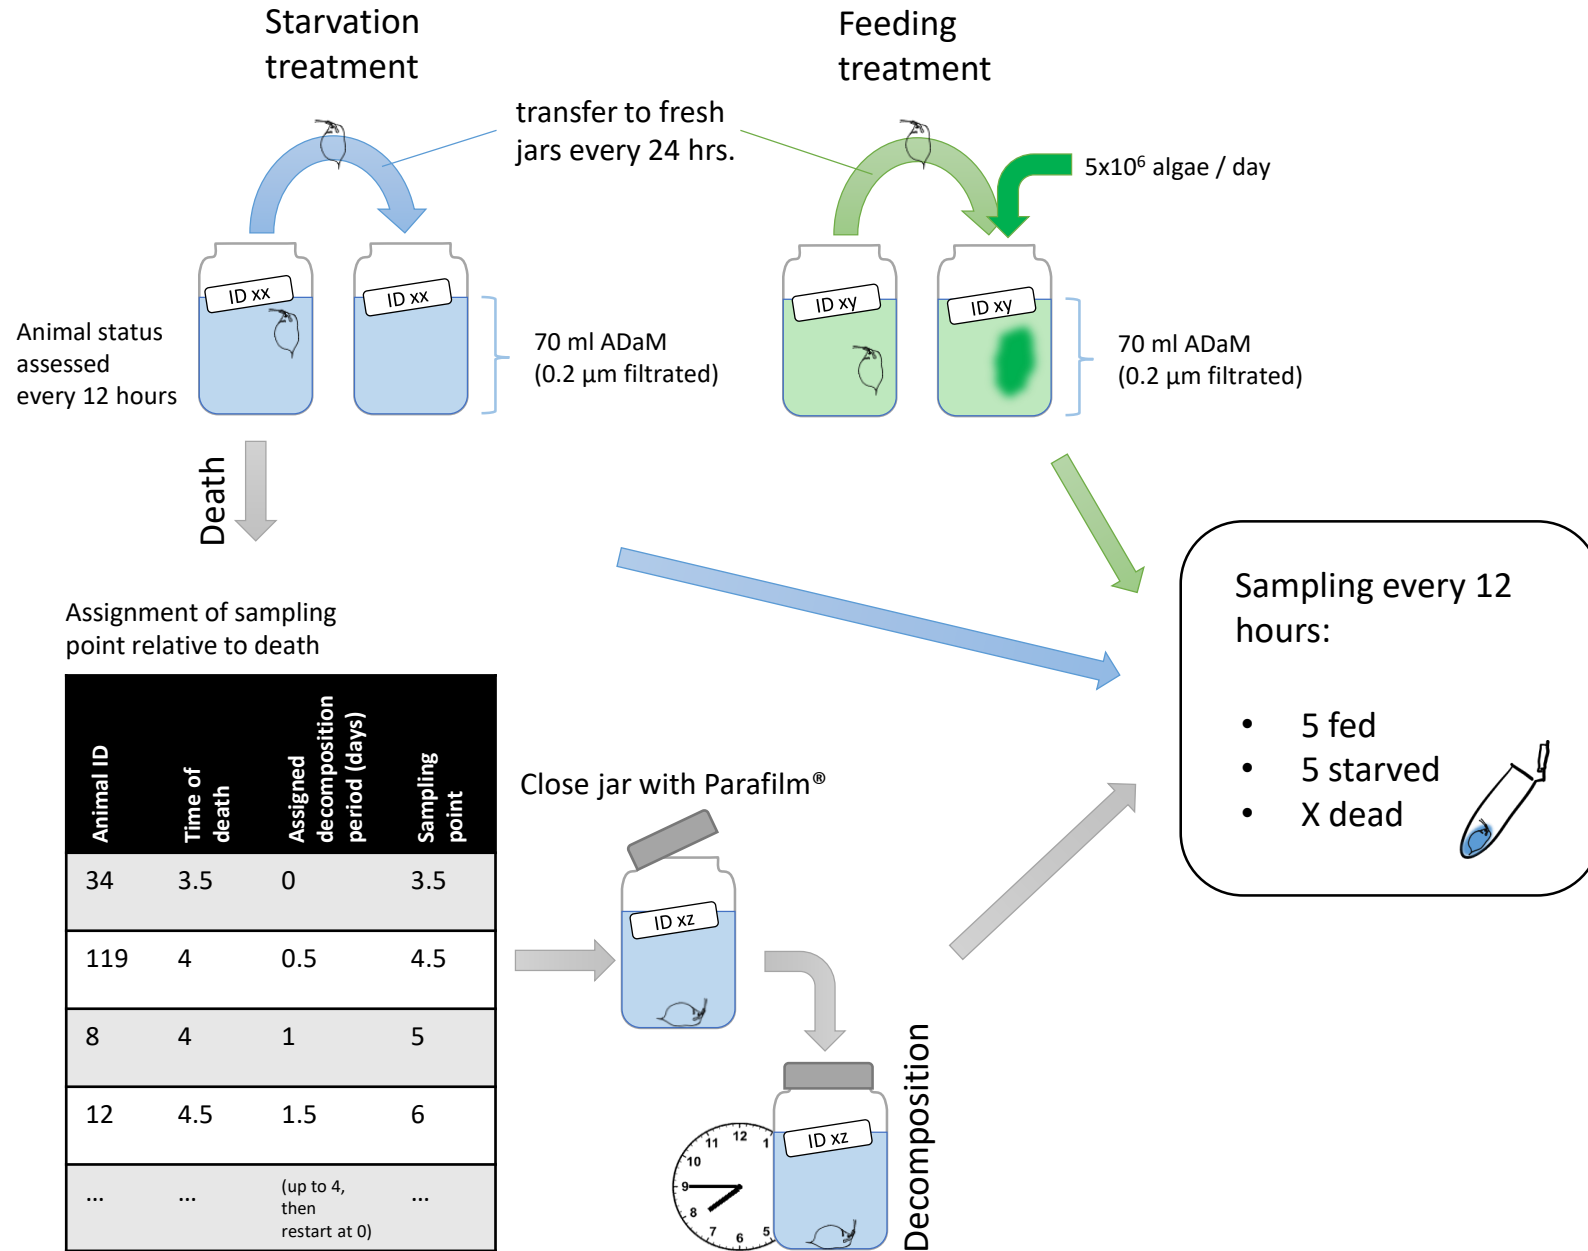

Supplement: 41396_2018_157_MOESM1_ESM.pdf [file 41396_2018_157_MOESM1_ESM.pdf]
